# Supplementary material
Source: publisher figshare collection journal article supplement (https://acs.figshare.com/ndownloader/files/13485473)
Supplement: Supplementary file 1 [file 13485473]

**SI cover page**

**Title:**

Structural Changes Induced by the Binding of the Calcium Desensitizer W7 to Cardiac Troponin

**Authors:**

Fangze Cai<sup>1</sup>, Peter M. Hwang<sup>2</sup> and Brian D. Sykes<sup>1</sup>

**Author affiliations**

<sup>1</sup>. Department of Biochemistry, University of Alberta, Edmonton, Alberta Canada T6G 2H7

<sup>2</sup>. Department of Medicine, University of Alberta, Edmonton, Alberta Canada T6G 2H7

\*. To whom correspondence should be addressed: [brian.sykes@ualberta.ca](mailto:brian.sykes@ualberta.ca)

## Supplementary Materials:

Figure S1

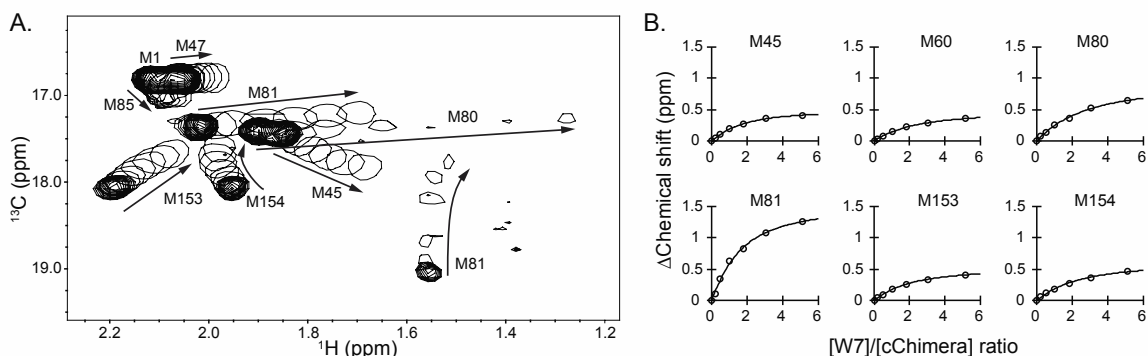

A. Overlay of 2D  $^1\text{H}$ ,  $^{13}\text{C}$ -HSQC NMR spectra of cChimera acquired during the titration of W7 showing the methionine methyl group region. The first point of each titration represented with multiple contours and subsequent titration points for the W7 are represented by single contours and the arrows indicate direction of induced change. B. Global fit of titration for M45, M60, M80, M81, M153 and M154 to determine  $K_D = 750 \pm 200 \mu\text{M}$ .

Figure S2

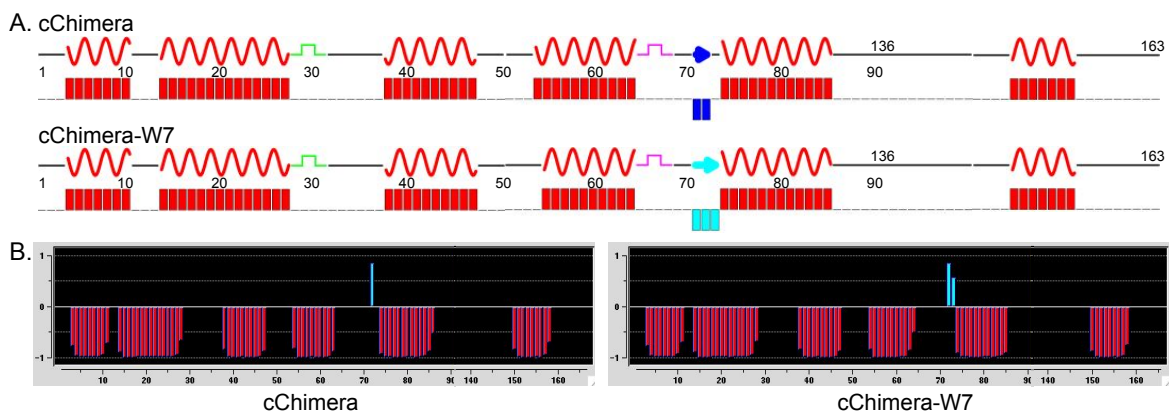

Secondary structure of cChimera and the cChimera-W7 complex predicted from backbone chemical shifts using: A. Chemical shift Index (CSI 3.0) and B. TALOS+. Predicted  $\alpha$  helices are shown in red,  $\beta$  sheets are shown in blue.
